# Supplementary material for: The First Exploratory Personalized Medicine Approach to Improve Bariatric Surgery Outcomes Utilizing Psychosocial and Genetic Risk Assessments: Encouraging Clinical Research
Source: MDPI journal article supplement (doi:10.3390/jpm13071164), 2023-07-20
Supplement: s1 [file s1]

## Supplemental Materials

Supplemental Table S1: Psychosocial Questionnaire Inventories

| <b>Inventory Name</b>                                                            | <b>Number of Items</b> | <b>Item Rating Scale</b> | <b>Reference*</b>                                                                                                                                                                                                                                           |
|----------------------------------------------------------------------------------|------------------------|--------------------------|-------------------------------------------------------------------------------------------------------------------------------------------------------------------------------------------------------------------------------------------------------------|
| Food Cravings Questionnaire – Trait Reduced (FCQ-T)                              | 15                     | 1-6                      | Meule, A., Hermann, T., & Kubler, A. 2014. A short version of the Food Cravings Questionnaire-Trait: the FCQ-T-reduced. <i>Frontiers in Psychology</i> , 5, 190.                                                                                            |
| Modified Yale Food Addiction Scale 2.9 (mYFAS 2.0)                               | 13                     | 0-7                      | Gearhardt, A., White, M., Masheb, R., Morgan, P., Crosby, R., Grilo, C. 2012. An examination of the Food Addiction Construct in obese patients with binge eating disorder. <i>Int J Eat Disord</i> , 45(5): 657-663.                                        |
| Eating Expectancies Inventory (EEI)                                              | 34                     | 1-7                      | Fitzsimmons-Craft, E., Keatts, D., & Bardone-Cone, A. 2013. Eating expectancies in relation to eating disorder recovery. <i>Cognit Ther Res</i> . 37(5): 104.                                                                                               |
| Eating Attitudes Test -26 (EAT-26)                                               | 26                     | 0-3                      | DM Garner, et al. The Eating Attitudes Test: Psychometric Features and Clinical Correlates. <i>Psychological Medicine</i> 871-878. 1982.                                                                                                                    |
| Quality of Life Enjoyment and Satisfaction Questionnaire- Short form (QLES-Q-SF) | 14                     | 1-5                      | Stevanovic, D. 2011. Quality of life enjoyment and satisfaction questionnaire-short form for quality of life assessments in clinical practice: a psychometric study. <i>Journal of Psychiatric and Mental Health Nursing</i> , 18(8).                       |
| Chronic Stress Index (CSI)                                                       | 22                     | 1-5                      | Schulz AJ, Mentz G, Lachance L, Johnson J, Gaines C, Israel BA. Associations between socioeconomic status and allostatic load: effects of neighborhood poverty and tests of mediating pathways. <i>Am J Public Health</i> . 2012;102(9):1706–14.            |
| Difficulties in Emotion Regulation Scale – Short Form (DERS-SF)                  | 18                     | 1-5                      | Kaufman, E., Xia, M., Fosco, G., Yaptangco, M., Skidmore, C., Crowell, S. 2015. The Difficulties in Emotion Regulation Scale Short Form (DERS-SF): Validation and replication in adolescent and adult samples. <i>J Psychological Behav Assess</i> , 37(3). |
| The Center for Epidemiologic Studies Depression Scale (CESDS)                    | 20                     | 0-4                      | Kapadia, S.G., Wei, C., Bartlett, S.J., Lang, J., Wise, R.A., Dixon, A.E. 2014. Obesity and symptoms of depression contribute independently to the poor asthma control of obesity. <i>Respiratory Medicine</i> , 108: 1100-1107.                            |
| Weight Influenced Self-Esteem Questionnaire (WISE-Q)                             | 22                     | 0-4                      | Trottier K, McFarlane T, Olmsted MP, McCabe RE. 2013. The Weight Influenced Self-Esteem Questionnaire (WISE-Q): factor structure and psychometric properties. <i>Body Image</i> 10:112-20                                                                   |
| Pittsburgh Sleep Quality Index (PSQI)                                            | 18                     | 0-3                      | Buyse DJ, Reynolds CF, Monk TH, Berman SR, Kuper DJ: The Pittsburgh Sleep Quality Index: A new instrument for psychiatric practice and research. <i>Psychiatry Research</i> 28:193-213, 1989                                                                |

Additional information and scoring instructions previously described in referenced literature.

Supplemental Table S2: GARS Panel\*

| <b>Gene</b>                            | <b>Polymorphism</b>                            | <b>Location</b>          | <b>Risk Allele(s)</b> |
|----------------------------------------|------------------------------------------------|--------------------------|-----------------------|
| Dopamine D1 Receptor DRD1              | rs4532 SNP                                     | Chr 5                    | A                     |
| Dopamine D2 Receptor DRD2              | rs1800497 SNP                                  | Chr 11                   | A                     |
| Dopamine D3 Receptor DRD3              | rs6280 SNP                                     | Chr 3                    | C                     |
| Dopamine D4 Receptor DRD4              | rs1800955 SNP<br>48 bases Repeat VNTR          | Chr 11<br>Chr 11, Exon 3 | C<br>7R,8R,9R,10R,11R |
| Catechol-O-Methyltransferase COMT      | rs4680 SNP                                     | Chr 22                   | G                     |
| Mu-Opioid Receptor OPRM1               | rs1799971 SNP                                  | Chr 6                    | G                     |
| Dopamine Active Transporter DAT 1      | 40 bases Repeat VNTR                           | Chr 5, Exon 15           | 3R,4R,5R,6R,7R,8R     |
| Monoamine Oxidase A MAOA               | 30 bases Repeat VNTR                           | Chr X, Promoter          | 3.5R, 4R              |
| Serotonin Transporter SLC6A4 (5HTTLPR) | 43 bases Repeat INDEL/VNTR plus<br>rs25531 SNP | Chr 17                   | LG, S                 |
| GABA(A) Receptor, Alpha-3 GABRB3       | CA-Repeat DNR                                  | Chr 15 (downstream)      | 181                   |

Table adopted from Blum et al., 2020. [13]
